# Supplementary material for: Beyond the NCCN Risk Factors in Colon Cancer: An Evaluation in a Swedish Population-Based Cohort
Source: PubMed Central journal article supplement (PMC7060230; doi:10.1245/s10434-019-08148-3), 2020-01-01
Supplement: 10434_2019_8148_MOESM1_ESM.pdf [file 10434_2019_8148_MOESM1_ESM.pdf]

**Supplementary Table 1:** Comparison of county cohort and national cohort

| Parameter                  | County 2010-2015 |      |       |        |       |        | SCRCR 2010-2014 |      |          |        |     |        |       |
|----------------------------|------------------|------|-------|--------|-------|--------|-----------------|------|----------|--------|-----|--------|-------|
|                            | Unadjusted       |      |       |        |       |        | Unadjusted      |      |          |        |     |        |       |
|                            | No.              | (%)  | HR    | TTR    | p     | HR OS  | p               | No.  | (%)      | HR     | TTR | p      | HR OS |
| <b>Total</b>               | 416              |      |       |        |       |        | 12446           |      |          |        |     |        |       |
| <b>Age (continuous)</b>    | 72, 12           |      |       |        |       |        | 72, 11          |      |          |        |     |        |       |
| <b>mean, sd</b>            |                  |      |       |        |       |        |                 |      |          |        |     |        |       |
| <b>Range</b>               | 26-96            |      |       |        |       |        | 17-101          |      |          |        |     |        |       |
| <b>Sex</b>                 |                  |      |       |        |       |        |                 |      |          |        |     |        |       |
| <b>Male</b>                | 208              | (50) | (Ref) |        |       | (Ref)  | 6084            | (49) | (Ref)    |        |     | (Ref)  |       |
| <b>Female</b>              | 208              | (50) | 1.1   | 0.541  | 0.9   | 0.464  | 6362            | (51) | 0.9      | 0.001  | 0.9 | <0.001 |       |
| <b>ASA</b>                 |                  |      |       |        |       |        |                 |      |          |        |     |        |       |
| <b>1</b>                   | 72               | (17) | (Ref) |        |       | (Ref)  | 1636            | (13) | (Ref)    |        |     | (Ref)  |       |
| <b>2</b>                   | 187              | (45) | 1.3   | 0.470  | 1.9   | 0.055  | 6510            | (52) | 1.0      | 0.747  | 1.8 | <0.001 |       |
| <b>3-4</b>                 | 157              | (38) | 1.5   | 0.220  | 4.0   | <0.001 | 3976            | (32) | 1.1      | 0.125  | 4.3 | <0.001 |       |
| <b>Surgery</b>             |                  |      |       |        |       |        |                 |      |          |        |     |        |       |
| <b>Elective</b>            | 341              | (82) | (Ref) |        |       | (Ref)  | 10438           | (84) | (Ref)    |        |     | (Ref)  |       |
| <b>Emergency</b>           | 75               | (18) | 3.0   | <0.001 | 1.8   | 0.004  | 1843            | (15) | 2.3      | <0.001 | 2.0 | <0.001 |       |
| <b>Complications</b>       |                  |      |       |        |       |        |                 |      |          |        |     |        |       |
| <b>No</b>                  | 298              | (72) | (Ref) |        |       | (Ref)  | 10171           | (82) | (Ref)    |        |     | (Ref)  |       |
| <b>Yes</b>                 | 118              | (28) | 1.5   | 0.095  | 1.8   | 0.002  | 2275            | (18) | 1.1      | 0.039  | 1.5 | <0.001 |       |
| <b>pT</b>                  |                  |      |       |        |       |        |                 |      |          |        |     |        |       |
| <b>1-2</b>                 | 72               | (17) | (Ref) | <0.001 | (Ref) |        | 2770            | (22) | (Ref T1) |        |     | (Ref)  |       |
| <b>3</b>                   | 269              | (65) | 3.8   | 0.010  | 1.2   | 0.429  | 7541            | (61) | 2.8      | <0.001 | 1.4 | <0.001 |       |
| <b>4</b>                   | 75               | (18) | 7.2   | <0.001 | 2.9   | <0.001 | 2130            | (17) | 7.1      | <0.001 | 2.8 | <0.001 |       |
| <b>NA</b>                  | 0                | (0)  |       |        |       |        | 6               | (0)  |          |        |     |        |       |
| <b>pN</b>                  |                  |      |       |        |       |        |                 |      |          |        |     |        |       |
| <b>0</b>                   | 226              | (54) | (Ref) | <0.001 | (Ref) |        | 7845            | (63) | (Ref)    |        |     | (Ref)  |       |
| <b>1</b>                   | 123              | (30) | 2.9   | <0.001 | 1.6   | <0.001 | 2864            | (23) | 2.8      | <0.001 | 1.5 | <0.001 |       |
| <b>2</b>                   | 67               | (16) | 7.6   | <0.001 | 2.4   | <0.001 | 1737            | (14) | 6.7      | <0.001 | 2.6 | <0.001 |       |
| <b>NA</b>                  | 0                | (0)  |       |        |       |        |                 |      |          |        |     |        |       |
| <b>Sampled nodes</b>       |                  |      |       |        |       |        |                 |      |          |        |     |        |       |
| <b>&lt;12</b>              | 38               | (9)  | (Ref) |        |       | (Ref)  | 1243            | (10) |          |        |     |        |       |
| <b>≥12</b>                 | 378              | (91) | 2.7   | 0.095  | 1.4   | 0.298  | 10937           | (88) | 1.1      | 0.451  | 0.8 | <0.001 |       |
| <b>Malignancy grade</b>    |                  |      |       |        |       |        |                 |      |          |        |     |        |       |
| <b>Low</b>                 | 350              | (84) | (Ref) |        |       | (Ref)  | 9202            | (74) | (Ref)    |        |     | (Ref)  |       |
| <b>High</b>                | 66               | (16) | 2.1   | 0.003  | 1.6   | 0.039  | 2554            | (21) | 1.5      | <0.001 | 1.5 | <0.001 |       |
| <b>Missing</b>             | 0                | (0)  |       |        |       |        | 696             | (6)  |          |        |     |        |       |
| <b>Vascular invasion</b>   |                  |      |       |        |       |        |                 |      |          |        |     |        |       |
| <b>No</b>                  | 291              | (70) | (Ref) | <0.001 | (Ref) |        | 8986            | (72) | (Ref)    |        |     | (Ref)  |       |
| <b>Yes</b>                 | 112              | (27) | 3.7   | <0.001 | 1.7   | 0.005  | 2907            | (23) | 3.0      | <0.001 | 1.9 | <0.001 |       |
| <b>Missing</b>             | 13               | (3)  |       |        |       |        | 794             | (6)  |          |        |     |        |       |
| <b>Perineural invasion</b> |                  |      |       |        |       |        |                 |      |          |        |     |        |       |
| <b>No</b>                  | 343              | (82) | (Ref) | <0.001 | (Ref) |        | 9733            | (78) | (Ref)    |        |     | (Ref)  |       |
| <b>Yes</b>                 | 52               | (13) | 3.6   | <0.001 | 2.0   | 0.001  | 1443            | (12) | 3.3      | <0.001 | 2.1 | <0.001 |       |
| <b>Missing</b>             | 21               | (5)  |       |        |       |        | 1511            | (12) |          |        |     |        |       |
| <b>Adjuvant treatment</b>  |                  |      |       |        |       |        |                 |      |          |        |     |        |       |
| <b>No</b>                  | 268              | (64) | (Ref) |        |       | (Ref)  | 8930            | (72) | (Ref)    |        |     | (Ref)  |       |
| <b>Yes</b>                 | 148              | (36) | 2.3   | <0.001 | 0.7   | 0.027  | 3516            | (28) | 2.2      | <0.001 | 0.7 | <0.001 |       |
| <b>Recurrences</b>         | 79               | (19) |       |        |       |        | 1965            | (16) |          |        |     |        |       |
| <b>Mortality</b>           | 135              | (32) |       |        |       |        | 4010            | (32) |          |        |     |        |       |
| <b>Complete cases</b>      | 394              | (95) |       |        |       |        | 10309           | (83) |          |        |     |        |       |

**Subtitle supplementary table 1:** Complete cases for the variables described in table 1. Unadjusted HR and p-values for the variables in the baseline models for TTR and OS.
