# Supplementary material for: Beyond the NCCN Risk Factors in Colon Cancer: An Evaluation in a Swedish Population-Based Cohort
Source: PubMed Central journal article supplement (PMC7060230; doi:10.1245/s10434-019-08148-3), 2020-01-01
Supplement: 10434_2019_8148_MOESM2_ESM.pdf [file 10434_2019_8148_MOESM2_ESM.pdf]

**Supplementary table 2:** Concordance values for the linear predictor score and 95% confidence intervals

| <i>Model</i>                  | <b>TTR</b>         | <b>95% CI</b> |              | <b>OS</b>          | <b>95% CI</b> |              |
|-------------------------------|--------------------|---------------|--------------|--------------------|---------------|--------------|
|                               | <i>Concordance</i> | <i>Lower</i>  | <i>Upper</i> | <i>Concordance</i> | <i>Lower</i>  | <i>Upper</i> |
| <b>Baseline (BL)</b>          | 0.77               | 0.71          | 0.83         | 0.79               | 0.74          | 0.83         |
| <b>BL + Side</b>              | 0.79               | 0.73          | 0.84         | 0.79               | 0.74          | 0.83         |
| <b>BL + pT substages</b>      | 0.77               | 0.71          | 0.83         | 0.80               | 0.75          | 0.84         |
| <b>BL + pN substages</b>      | 0.77               | 0.71          | 0.83         | 0.79               | 0.74          | 0.84         |
| <b>BL + LNR</b>               | 0.77               | 0.71          | 0.83         | 0.79               | 0.74          | 0.83         |
| <b>BL + TD</b>                | 0.77               | 0.71          | 0.83         | 0.79               | 0.75          | 0.84         |
| <b>BL + Preoperative CEA</b>  | 0.77               | 0.71          | 0.83         | 0.79               | 0.74          | 0.84         |
| <b>BL + Postoperative CEA</b> | 0.78               | 0.72          | 0.84         | 0.79               | 0.74          | 0.83         |
| <b>BL + Preoperative CRP</b>  | 0.78               | 0.72          | 0.84         | 0.79               | 0.74          | 0.83         |
| <b>BL + Postoperative CRP</b> | 0.77               | 0.71          | 0.83         | 0.79               | 0.75          | 0.84         |

Subtitle supplementary table 2: All, except baseline, adjusted for baseline
