# Supplementary material for: Beyond the NCCN Risk Factors in Colon Cancer: An Evaluation in a Swedish Population-Based Cohort
Source: PubMed Central journal article supplement (PMC7060230; doi:10.1245/s10434-019-08148-3), 2020-01-01
Supplement: 10434_2019_8148_MOESM3_ESM.pdf [file 10434_2019_8148_MOESM3_ESM.pdf]

**Supplementary table 3:** Cox proportional hazards regression, OS, for investigated variables

| OS | Factor               | Level         | Unadjusted |     |      | Adjusted |       |     |      |        |
|----|----------------------|---------------|------------|-----|------|----------|-------|-----|------|--------|
|    |                      |               | HR         | CI- | CI+  | P        | HR    | CI- | CI+  | P      |
|    | <b>Side</b>          | <b>Right</b>  | (Ref)      |     |      |          | (Ref) |     |      |        |
|    |                      | <b>Left</b>   | 0.7        | 0.5 | 1.0  | 0.049    | 0.6   | 0.4 | 0.9  | 0.024  |
|    | <b>pT</b>            | <b>pT1-2</b>  | (Ref)      |     |      | <0.001   | (Ref) |     |      | <0.001 |
|    | <b>pT3</b>           | <b>a</b>      | 0.9        | 0.4 | 1.9  | 0.763    | 0.8   | 0.4 | 1.8  | 0.570  |
|    |                      | <b>b</b>      | 1.1        | 0.6 | 2.1  | 0.709    | 1.0   | 0.5 | 1.8  | 0.887  |
|    |                      | <b>c</b>      | 1.1        | 0.6 | 2.0  | 0.864    | 0.8   | 0.4 | 1.6  | 0.512  |
|    |                      | <b>d</b>      | 2.3        | 1.2 | 4.4  | 0.015    | 1.4   | 0.6 | 3.0  | 0.401  |
|    | <b>pT4</b>           | <b>a</b>      | 2.9        | 1.6 | 5.4  | 0.001    | 2.5   | 1.2 | 5.1  | 0.017  |
|    |                      | <b>b</b>      | 2.9        | 1.4 | 6.0  | 0.004    | 2.0   | 0.9 | 4.5  | 0.085  |
|    | <b>pN</b>            | <b>0</b>      | (Ref)      |     |      | <0.001   | (Ref) |     |      | <0.001 |
|    |                      | <b>1a</b>     | 1.8        | 1.1 | 3.0  | 0.017    | 2.2   | 1.2 | 3.8  | 0.007  |
|    |                      | <b>1b</b>     | 1.6        | 1.0 | 2.7  | 0.058    | 2.6   | 1.5 | 4.7  | 0.001  |
|    |                      | <b>1c</b>     | 1.0        | 0.4 | 2.7  | 0.964    | 1.4   | 0.4 | 4.2  | 0.590  |
|    |                      | <b>2a</b>     | 1.7        | 0.9 | 3.1  | 0.077    | 3.0   | 1.5 | 6.0  | 0.002  |
|    |                      | <b>2b</b>     | 3.5        | 2.1 | 5.9  | <0.001   | 6.5   | 3.4 | 12.5 | <0.001 |
|    | <b>LNR</b>           | <b>0-1</b>    | 8.6        | 3.8 | 19.6 | <0.001   | 6.3   | 1.5 | 26.2 | 0.011  |
|    | <b>CEA</b>           | <b>ng/ml</b>  |            |     |      |          |       |     |      |        |
|    | <b>Preoperative</b>  | <b>&lt;5</b>  | (Ref)      |     |      |          | (Ref) |     |      |        |
|    |                      | <b>&gt;5</b>  | 1.6        | 1.1 | 2.5  | 0.020    | 1.2   | 0.8 | 1.9  | 0.417  |
|    | <b>Postoperative</b> | <b>&lt;5</b>  | (Ref)      |     |      |          | (Ref) |     |      |        |
|    |                      | <b>&gt;5</b>  | 2.5        | 1.3 | 4.7  | 0.006    | 2.3   | 1.1 | 4.9  | 0.033  |
|    | <b>CRP</b>           | <b>mg/l</b>   |            |     |      |          |       |     |      |        |
|    | <b>Preoperative</b>  | <b>&lt;10</b> | (Ref)      |     |      |          | (Ref) |     |      |        |
|    |                      | <b>&gt;10</b> | 1.6        | 1.1 | 2.2  | 0.019    | 0.8   | 0.5 | 1.3  | 0.357  |
|    | <b>Postoperative</b> | <b>&lt;10</b> | (Ref)      |     |      |          | (Ref) |     |      |        |
|    |                      | <b>&gt;10</b> | 2.8        | 1.8 | 4.5  | <0.001   | 2.2   | 1.3 | 3.6  | 0.004  |
|    | <b>TD</b>            | <b>No</b>     | (Ref)      |     |      |          | (Ref) |     |      |        |
|    |                      | <b>Yes</b>    | 1.5        | 0.9 | 2.3  | 0.086    | 0.8   | 0.4 | 1.4  | 0.375  |

**Subtitle supplementary table 3:** Variables tested one by one (unadjusted) or with the baseline model (Adjusted)

LNR: Lymph node ratio (positive nodes by found nodes)

HR: Hazard ratio, CI: 95% Confidence interval, with lower and upper bounds reported.
